1 **LRR-extensins of vegetative tissues are a functionally conserved family of**  
2 **RALF1 receptors interacting with the receptor kinase FERONIA**

3

4 Aline Herger<sup>1,¶</sup>, Shibu Gupta<sup>1,¶</sup>, Gabor Kadler<sup>1</sup>, Christina Maria Franck<sup>1,2</sup>, Aurélien Boisson-  
5 Dernier<sup>2</sup>, Christoph Ringli<sup>\*</sup>

6

7 <sup>1</sup> Institute of Plant and Microbial Biology, University of Zurich, 8008 Zurich, Switzerland.

8 <sup>2</sup> Biocenter, Botanical Institute, University of Cologne, 50674 Cologne, Germany

9

10

11 <sup>\*</sup> corresponding author, e-mail: [chringli@botinst.uzh.ch](mailto:chringli@botinst.uzh.ch)

12 <sup>¶</sup> these two authors have equally contributed to the manuscript

13

14

15 short title: LRXs are functionally conserved and interact with FER and RALF1

16

17

## 18 **Abstract**

19 Plant cell growth requires the coordinated expansion of the protoplast and the cell wall that  
20 confers mechanical stability to the cell. An elaborate system of cell wall integrity sensors  
21 monitors cell wall structures and conveys information on cell wall composition and growth  
22 factors to the cell. LRR-extensins (LRXs) are cell wall-attached extracellular regulators of cell  
23 wall formation and high-affinity binding sites for RALF (rapid alkalization factor) peptide  
24 hormones that trigger diverse physiological processes related to cell growth. RALF peptides  
25 are also perceived by receptors at the plasma membrane and LRX4 of *Arabidopsis thaliana*  
26 has been shown to also interact with one of these receptors, FERONIA (FER). Here, we  
27 demonstrate that several LRXs, including the main LRX protein of root hairs, LRX1, interact  
28 with FER and RALF1 to coordinate growth processes. Membrane association of LRXs  
29 correlate with binding to FER, indicating that LRXs represent a physical link between intra- and  
30 extracellular compartments via interaction with membrane-localized proteins. Finally, despite  
31 evolutionary diversification of the LRR domains of various LRX proteins, many of them are  
32 functionally still overlapping, indicative of LRX proteins being central players in regulatory  
33 processes that are conserved in very different cell types.

34

## 35 **Author Summary**

36 Cell growth in plants requires the coordinated enlargement of the cell and the surrounding cell  
37 wall, which is ascertained by an elaborate system of cell wall integrity sensors, proteins  
38 involved in the exchange of information between the cell and the cell wall. In *Arabidopsis*  
39 *thaliana*, LRR-extensins (LRXs) are localized in the cell wall and are binding RALF peptides,  
40 hormones that regulate cell growth-related processes. LRX4 also binds the plasma membrane-  
41 localized receptor kinase FERONIA (FER), establishing a link between the cell and the cell  
42 wall. It is not clear, however, whether the different LRXs of *Arabidopsis* have similar functions  
43 and how they interact with their binding partners. Here, we demonstrate that interaction with  
44 FER and RALFs requires the LRR domain of LRXs and several but not all LRXs can bind these

45 proteins. This explains the observation that mutations in several of the *LRXs* induce  
46 phenotypes comparable to a *fer* mutant, establishing that LRX-FER interaction is important for  
47 proper cell growth. Some LRXs, however, appear to influence cell growth processes in different  
48 ways, which remain to be identified.

49

50

## 51 **Introduction**

52 The plant cell wall is a complex structure of interwoven polysaccharides and structural proteins  
53 that protects the cell from biotic and abiotic stresses [1]. Importantly, it serves as a shape-  
54 determining structure that resists the internal turgor pressure emanating from the vacuole. Cell  
55 growth requires a tightly regulated expansion of the cell wall, generally accompanied by the  
56 concomitant biosynthesis of new cell wall material that is integrated into the expanding cell wall  
57 [2]. The signal transduction machinery required for coordinating the intra- and extracellular  
58 processes involves a number of transmembrane proteins at the plasma membrane to connect  
59 the different cellular compartments [3]. Among those, the *Catharanthus roseus* receptor-like  
60 kinase 1-like protein (*CrRLK1L*) THESEUS1 revealed to be a cell wall integrity sensor that  
61 perceives reduced cellulose content in the cell wall and induces compensatory changes in cell  
62 wall composition to restrain growth [4]. Several members of the *CrRLK1L* family are involved  
63 in cell growth processes [5,6,7,8,9]. FERONIA (FER) is required for proper pollen tube  
64 reception during the fertilization process involving local disintegration of the cell wall [10]. The  
65 extracellular domain of FER has been demonstrated to bind pectin, a major component of cell  
66 walls [11]. This interaction could contribute to the function of FER during cell wall integrity  
67 sensing and perception of mechanical stresses [11,12,13]. Several *CrRLK1L* receptors have  
68 been demonstrated to bind rapid alkalization factor (RALF) peptides, that induce  
69 alkalization of the extracellular matrix, change Ca<sup>2+</sup> fluxes and modulate cell growth and  
70 response to pathogens [14,15,16,17,18,19,20,21]. Hence, *CrRLK1L* proteins appear to have  
71 multiple functions, suggesting that their activity is at the nexus of different cell growth-related  
72 activities.

73 RALF1 was identified as a ligand of FER and a number of proteins are involved in the RALF1-  
74 FER triggered signaling process, either as signaling intermediates such as ROP2, ROPGEF,  
75 ABI2, RIPK [22,23,24], co-receptor such as BAK1 [25], or as targets of the FER-dependent  
76 pathway, such as AHA2 [15]. The receptor kinase-like protein MARIS (MRI) and the  
77 phosphatase ATUNIS1 (AUN1) were identified as downstream components of signaling  
78 activities induced by ANXUR1 and 2 (ANX1/2), pollen-expressed FER homologs [6,26,27]. It  
79 is not clear at this point, however, to what extent the signaling components are shared among  
80 the different CrRLK1Ls. Both AUN1 and MRI also influence root hair growth, indicating that  
81 they might function downstream of a root hair-expressed CrRLK1L protein [26].

82 LRX (LRR-extensins) are extracellular proteins involved in cell wall formation and cell growth.  
83 They consist of an N-terminal (NT) domain and a Leucine-rich repeat (LRR) of 11 repeats,  
84 followed by a short Cys-rich domain (CRD) serving as a linker to the C-terminal extensin  
85 domain (Figure 1) [28,29]. The extensin domain contains Ser-Hyp<sub>n</sub> repetitive sequences that  
86 are characteristic for hydroxyproline-rich glycoproteins[30,31] and appears to serve in  
87 anchoring the protein in the extracellular matrix [32,33]. The N-terminal moiety with the NT-  
88 and LRR-domain associates with the membrane fraction [34], indicating a function of LRXs in  
89 linking the cell wall with the plasma membrane by binding of a membrane localized interaction  
90 partner. The recent identification of LRX4 as an interactor of FER corroborates this hypothesis  
91 [35].

92 The LRX family of Arabidopsis consist of eleven members, most of which are expressed in a  
93 tissue-specific manner. LRX1/2, LRX3/4/5, and LRX8/9/10/11 are predominantly expressed in  
94 root hairs, in the main root and the shoot, and pollen, respectively. Mutations in these genes  
95 cause cell wall perturbation and cell growth defects in the respective cell types [32,34,36,37].  
96 *lrx1* mutants develop deformed root hairs that are swollen, branched, and frequently burst [32].  
97 This phenotype is strongly enhanced in *lrx1 lrx2* double mutants that are virtually root hair less  
98 [36]. The *lrx345* triple mutant shows defects in vacuole development, monitoring of cell wall  
99 modifications, and sensitivity to salt stress that are reminiscent of a *fer* mutant [35,38], which  
100 is in line with LRX4 and possibly other LRXs interacting with FER. Mutants affected in several

101 of the pollen-expressed *LRXs* are impaired in pollen tube growth and show reduced fertility  
102 [34,39,40].

103 *LRX* proteins were recently identified as high-affinity binding sites for RALF peptides, with the  
104 binding spectrum differing among the *LRXs*. *LRX8* of pollen tubes was shown to physically  
105 interact with RALF4 [41] while in vegetative tissues, the root/shoot-expressed *LRX3*, *LRX4*,  
106 and *LRX5* were reported to bind RALF1,22,23,24, and 31 [38,42]. Whether and how the  
107 binding of RALFs to *LRXs* and FER influence the interaction of these proteins remains to be  
108 investigated. It is also not clear to what extent the different *LRXs* are functionally similar and  
109 whether they share FER as a common interaction partner.

110 Here, we analyzed *LRX* protein functions and demonstrate that the membrane-association of  
111 *LRXs* correlates with the ability to bind FER. The root hair-expressed *LRX1* binds FER and  
112 RALF1, and this binding activity is also revealed for other *LRX* proteins. Together with the *fer*-  
113 like phenotype of higher-order *lrx* mutants, this suggests that *LRX* proteins of different  
114 vegetative tissues interact with the ubiquitously expressed FER. Cross-complementation  
115 experiments of *lrx* mutants suggest that some but not all *LRX* proteins exert similar functions.  
116 Together with recently published data, this suggests that *LRX* proteins interact with RALF  
117 peptides and FER, but that they also carry additional functions independent of these protein-  
118 protein interactions that are relevant for the regulation of cell growth.

119

## 120 **Results**

### 121 **The membrane association and interaction of *LRX4* with FER depends on the LRR** 122 **domain**

123 We have previously shown that *LRX* proteins associate with the membrane and *LRX4* binds  
124 the CrRLK1L FER [34,42]. *LRX4* deletion constructs were produced to test for correlation  
125 between FER binding and membrane association. The *LRX4* promoter was used to express  
126 *LRX4*<sup>ΔE</sup>-HA (coding for *LRX4* missing the extensin domain), *LRX4*<sup>ΔLRRΔE</sup>-HA (coding for  
127 *LRX4* missing the LRR- and the extensin domain), and *LRX4*<sup>ΔNTΔE</sup>-HA (coding for *LRX4*

128 missing the NT- and the extensin domain) (Figure 1) in transgenic Arabidopsis. (Gene  
129 identifiers of all genes used in this study are listed in the Material and Methods section.)  
130 Extensin deletion constructs were used in this and in later experiments to prevent  
131 insolubilization of the LRX protein in the cell wall. Membrane fractions of the different  
132 transgenic lines were isolated from seedlings and tested for presence of the recombinant  
133 protein. As shown in Figure 2A, all proteins were present in the total fraction. While LRX4 $\Delta E$ -  
134 HA and LRX4 $\Delta NT\Delta E$ -HA were also detected in the membrane fraction, LRX4 $\Delta LRR\Delta E$ -HA was  
135 not. Successful isolation of membrane fractions was confirmed by detection of the membrane-  
136 marker protein LHC1a [43]. This demonstrates that the membrane association of LRX4  
137 depends on the presence of its LRR domain. Next, the constructs *LRX4 $\Delta NT\Delta E$ -HA* and  
138 *LRX4 $\Delta LRR\Delta E$ -HA* were expressed under the 35S *CaMV* promoter (subsequently referred to  
139 as 35S) in *N. benthamiana* for co-immunoprecipitation (Co-IP) experiments with the  
140 extracellular domain (ECD) of FER fused to citrine (FER<sup>ECD</sup>-citrine) or FLAG (FER<sup>ECD</sup>-  
141 FLAG). Co-IP analysis revealed that the FER<sup>ECD</sup> was co-purified when expressed with  
142 LRX4 $\Delta NT\Delta E$ -HA (Figure 2B) but not with LRX4 $\Delta LRR\Delta E$ -HA (Figure 2C). These analyses reveal  
143 a positive correlation between LRX4 $\Delta E$  binding to FER and its association with the plasma  
144 membrane.

145

#### 146 **Several LRXs of vegetative tissue interact with FER**

147 The root hair-expressed LRX1 is so far the best characterized LRX protein and the *lrx1* root  
148 hair mutant represents a convenient genetic system for analyses of LRX protein function  
149 [32,33,44,45]. Since FER was reported to maintain cell wall integrity in growing root hairs  
150 [23,26], it was interesting to test whether LRX1 also interacts with FER. To this end, constructs  
151 encoding LRX1 $\Delta E$ -HA and FER<sup>ECD</sup>-citrine under the 35S promoter were expressed in tobacco  
152 for Co-IP experiments. LRX1 $\Delta E$  shows interaction with FER<sup>ECD</sup> (Figure 2D). Interaction of  
153 LRX1 with FER<sup>ECD</sup> was also confirmed in a yeast-two-hybrid experiment (Suppl. Figure S1).  
154 The yeast-two-hybrid experiments were extended to other LRXs of vegetative tissues, namely

155 LRX2, LRX3, LRX4, and LRX5. While LRX2, LRX4, and LRX5 showed interaction with  
156 FER<sup>ECD</sup>, LRX3 failed to interact (Suppl. Figure S1). However, the BD-LRX3 did not  
157 accumulate to detectable levels in yeast extracts (data not shown). Hence, a conclusion on  
158 LRX3- FER<sup>ECD</sup> interaction cannot be drawn. Therefore, Co-IP experiments were conducted  
159 with LRX3<sup>ΔE</sup> and FER<sup>ECD</sup>, but failed to show interaction of these two proteins, as found by  
160 others [38].

161

### 162 **The *lrx12345* quintuple mutant mimics the *fer-4* mutant phenotype**

163 The results obtained above suggest that the five LRX proteins expressed in vegetative tissue  
164 that have been analyzed so far could exert overlapping functions. Since a double mutant for  
165 the root hair-expressed *LRX1* and *LRX2* [36] displays a root hair phenotype comparable to the  
166 knock-out mutant *fer-4* (Duan et al., 2008), and the *lrx345* triple mutant develops a shoot  
167 phenotype that is reminiscent of *fer-4* [38,42], we anticipated that an *lrx12345* quintuple mutant  
168 would be globally similar to *fer-4*. The *lrx1 lrx2* mutant was crossed with the *lrx345* triple mutant  
169 and an *lrx12345* quintuple mutant was identified in the segregating F2 population of this cross  
170 based on a root hair-less root and retarded shoot growth with an increase in anthocyanin  
171 content (Figure 3A). Indeed, the *lrx12345* quintuple mutant shows *fer-4* like phenotypes in the  
172 root and shoot at the seedling stage and, at the adult stage, smaller and broader rosette leaves  
173 with increased accumulation of anthocyanin compared to the wild type (Figure 3A). *fer-4*  
174 seedlings grown in vertical orientation display reduced gravitropic growth of the root [46]. This  
175 growth defect was assessed in the wild type, *fer-4*, and different *lrx* mutant combinations by  
176 assessing the vertical growth index [47]. For quantification, the ratio between the absolute root  
177 length and the progression of the root along the gravity vector, the arccos of  $\alpha$ , was used as  
178 illustrated in Figure 3B. Accumulating *lrx* mutations cause an agravitropic response  
179 comparable to *fer-4* (Figure 3C). Thus, the genetic analysis of higher-order *lrx* mutants and *fer-4*  
180 support the finding that most of the LRXs are active in the signaling pathway of FER and are  
181 able to interact with FER.

182

183 **The LRR domain is necessary for the dominant negative effect of LRX1 missing the**  
184 **extensin domain**

185 Expression of a truncated version of LRX1 lacking the extensin coding sequence (LRX1 $\Delta E$ ;  
186 Figure 1) under the *LRX1* promoter induces a dominant-negative effect in wild-type seedlings,  
187 resulting in a defect in root hair formation [32,33], possibly because LRX1 $\Delta E$  competes with  
188 the endogenous LRX1 for binding partners. This observed activity of LRX1 $\Delta E$  was used for  
189 further functional analysis of the LRX1 protein. Specifically, we assessed which domains are  
190 required or dispensable for the dominant negative effect. Of the LRX1 $\Delta E$  construct, the LRR  
191 domain or the NT domain were removed, resulting in LRX1 $\Delta LRR\Delta E$  and LRX1 $\Delta NT\Delta E$ ,  
192 respectively (Figure 1). The corresponding constructs under the *LRX1* promoter were  
193 transformed into wild-type Columbia plants. T2 seedlings expressing either of the two  
194 constructs developed wild-type root hairs (Figure 4A), hence failed to produce the dominant-  
195 negative effect on root hair development. Extracts from root tissue of the different lines were  
196 used for western blotting. An antibody detecting the myc-tag of the recombinant LRX1  
197 variants confirmed that the proteins were produced. As shown in Figure 4B, the transgenic  
198 lines produce proteins with the expected decrease in mass of LRX1 $\Delta E$  > LRX1 $\Delta NT\Delta E$  >  
199 LRX1 $\Delta LRR\Delta E$ . Together, this indicates that both the LRR- and the NT-domain are required but  
200 neither is sufficient to induce the dominant-negative effect on root hair development.

201 In a complementary approach, we tested whether the NT-domain is required for the function  
202 of the full-length LRX1. To this end, the *lrx1* and *lrx1 lrx2* mutants developing intermediate and  
203 strong root hair defects, respectively [36], were transformed with the constructs *LRX1:LRX1*  
204 and *LRX1:LRX1 $\Delta NT$* . Unlike the full-length *LRX1* which complements the *lrx1* mutant  
205 (Baumberger et al, 2001, Ringli 2010) and the *lrx1 lrx2* mutant (Suppl. Figure S2), *LRX1 $\Delta NT$*   
206 failed to induce wild-type root hairs in either of the mutants (Suppl. Figure S2).

207



208 **LRX1, LRX4, and LRX5 are high-affinity binding sites for RALF1**

209 LRX4 has been shown to bind rapid alkalization factor 1 (RALF1) a peptide hormone that  
210 also interacts with FER [15,42]. Here, we tested binding of RALF1 by LRX1. Transient  
211 expression of *LRX1*<sup>ΔE</sup>-HA and *RALF1*-FLAG in *N. benthamiana* followed by Co-IP and  
212 western blotting showed interaction of the two proteins (Figure 5A). This was confirmed by  
213 Y2H, where under selective conditions, yeast cells grew effectively in the presence of the two  
214 proteins (Suppl. Figure S3).

215 The kinetics of the interaction of LRX proteins with RALF1 were tested with Biolayer  
216 Interferometry (BLITZ). The LRX<sup>ΔE</sup>-FLAG proteins of LRX1, LRX3, LRX4, and LRX5 used for  
217 this experiment were expressed transiently in tobacco. Expression of all proteins to  
218 comparable levels was confirmed by western blotting prior to BLITZ analysis. For RALF1, *in*  
219 *vitro* synthesized peptide was used. This analysis revealed a dissociation constant K<sub>d</sub> of  
220 around 5 nM for the interaction of LRX1, LRX4, and LRX5 with RALF1 (Suppl. Figure S4).  
221 LRX3, by contrast, did not show interaction with RALF1 (Table 1).

222

223 **Table 1** Dissociation constant of LRXs-RALF1 interactions

| LRX protein | RALF1 K <sub>d</sub> (nM) |
|-------------|---------------------------|
| LRX1        | 4.5                       |
| LRX3        | 11 x e6                   |
| LRX4        | 5.5                       |
| LRX5        | 3.5                       |

224 K<sub>d</sub> was determined by BLITZ, using purified LRX<sup>ΔE</sup> expressed in *N. benthamiana*.

225

226 Finally, the structural requirements for the LRX-RALF1 interaction was tested by expressing  
227 the *LRX4* deletion constructs *LRX4*<sup>ΔNTΔE</sup>-HA and *LRX4*<sup>ΔLRRΔE</sup>-HA with *RALF1*-FLAG in *N.*  
228 *benthamiana* for Co-IP experiments. As shown in Figure 5B and 5C, *LRX4*<sup>ΔNTΔE</sup>-HA but not  
229 *LRX4*<sup>ΔLRRΔE</sup>-HA showed co-purification with RALF1-FLAG, indicating that the LRR domain  
230 is necessary and sufficient for LRX-RALF1 interaction.

231

## 232 **Functional equivalence among different LRX proteins**

233 Analyzes performed so far suggest that most LRX proteins have comparable functions while  
234 LRX3 appears to have overlapping but non-identical binding abilities [[38], this work]. To  
235 compare *in planta* the function and activity of *LRX* genes expressed in different tissues, trans-  
236 complementation experiments were performed. To this end, the genomic coding sequence of  
237 *LRX1* encoding a cmyc-tag at the beginning of the LRR domain that does not interfere with  
238 protein function [32] was cloned into an overexpression cassette containing the 35S promoter  
239 and the resulting 35S:*LRX1* construct was used for transformation of the *lrx345* triple mutant.  
240 Several independent homozygous transgenic lines were identified and characterized. Semi-  
241 quantitative RT-PCR confirmed expression of the transgene in the lines (Suppl. Figure S5A).  
242 For assessment of the complementation of the *lrx345* phenotype, alterations in plant growth  
243 and physiology were used as parameters. *lrx345* mutants grow smaller than the wild type both  
244 at seedling stage and at later stages when grown in soil [37]. This phenotype is alleviated in  
245 the transgenic lines (Figure 6A, Suppl. Figure S6A). The increased anthocyanin accumulation  
246 in *lrx345* mutant seedlings compared to the wild type is significantly reduced in transgenic lines  
247 (Figure 6B). The recently reported salt-hypersensitivity of the *lrx345* triple mutant resulting in  
248 reduced root growth and strong reduction in shoot growth in the presence of 100 mM NaCl [38]  
249 was also alleviated in the transgenic lines (Figure 6C and D). Hence, ectopically expressed  
250 *LRX1* can largely rescue the *lrx345* mutant phenotypes.

251 In a complementary experiment, rescue of the intermediate root hair phenotype of the *lrx1*  
252 mutant, and the strong root hair phenotype of the *lrx1 lrx2* mutant [36] with *LRX3*, *LRX4*, and  
253 *LRX5* was tested. Due to the repetitive nature of the extensin coding sequences of *LRX3*,  
254 *LRX4*, and *LRX5*, these could not be stably maintained in *E.coli*. Therefore, and as previously  
255 described [37], the extensin-coding domains of *LRX3,4,5* genes were replaced by the one of  
256 *LRX1*. The resulting chimeric genes are referred to as *L3E1*, *L4E1*, and *L5E1* (L and E referring  
257 to the N-terminal moiety from the start codon to the CRD and the extensin coding sequence,  
258 respectively). The constructs encoding the chimeric proteins were placed under the control of  
259 the 35S promoter and were transformed into the *lrx1* and *lrx1 lrx2* mutants. For each of the

260 three constructs, several independent T2 lines were identified, all of which showed expression  
261 of the transgene (Suppl. Figure S5B). The root hair growth defect of the *lrx1* mutant (Suppl.  
262 Figure S6B) as well as the stronger *lrx1 lrx2* double mutant phenotype (Figure 6E) were  
263 suppressed by either of the three chimeric constructs.

264 The pollen-expressed *LRX8-LRX11* [34] form a separate phylogenetic clade and are more  
265 similar to pollen-expressed *LRXs* of other plants than to vegetative *LRXs* of Arabidopsis  
266 [29,48]. It was tested whether the N-terminal moieties of these *LRXs* are functionally  
267 comparable to *LRX1*. The chimeric constructs *L8E1*, *L10E1*, and *L11E1* under the *35S*  
268 promoter were transformed into the *lrx1 lrx2* double mutant. Several independent transgenic  
269 T2 lines were produced for each construct and transgene expression was confirmed in the  
270 lines (Suppl. Fig. S5C), but full rescue was only observed in plants expressing *L10E1*, while  
271 seedlings expressing *L8E1* or *L11E1* displayed poor root hair growth (Figure 6E). Expressing  
272 *L8E1* and *L11E1* in the *lrx1* single mutant resulted in rescue of the *lrx1* root hair phenotype  
273 (Suppl. Figure S6B), confirming that these proteins are in principle functional. These results  
274 suggest that the N-terminal moieties of different *LRX* proteins of vegetative tissues are  
275 sufficiently overlapping in their activities to replace *LRX* genes active in other vegetative cell  
276 types. By contrast, pollen-expressed *LRXs* have functionally diverged to varying degrees,  
277 some being similar but not equivalent to the *LRXs* expressed in vegetative tissues.

278

### 279 **LRX downstream signaling components**

280 The FER homologs ANXUR1 and 2 (*ANX1/2*) are required to maintain pollen tube growth [6,49]  
281 and bind pollen-expressed RALF4 and 19 [21]. *AUN1<sup>D94N</sup>* and *MRI<sup>R240C</sup>* are two  
282 suppressors of the *anx1 anx2* male sterility [26,27]. To test whether the signaling pathways  
283 involving CrRLK1Ls and *LRX* proteins are comparable in reproductive and somatic tissues,  
284 the *lrx1 lrx2* double mutant was transformed with an *MRI:AUN1<sup>D94N</sup>-YFP* and a  
285 *MRI:MRI<sup>R240C</sup>-YFP* construct [26]. Several independent T2 plants transgenic for either of the  
286 two constructs displayed partial suppression of the *lrx1 lrx2* root hair phenotype (Figure 7,  
287 Suppl. Figure S7). Root hairs in *MRI<sup>R240C</sup>-YFP* transgenic lines are frequently shorter than in

288 the wild type, which is attributable to the function of MRI<sup>R240C</sup> [26]. This suggests that both  
289 AUN1 and MRI play a role in the signaling pathway downstream of LRX1 and LRX2.

290

## 291 **Discussion**

292 LRX proteins localize to the cell wall and have been shown to be involved in cell wall formation  
293 processes [34,36,37,39,40]. Only recently, their molecular function in this process has started  
294 to be unraveled by the identification of LRXs as extracellular binding sites of RALF peptides  
295 [35,38,41]. The association of LRX4 with the plasma membrane [34] and the identification of  
296 LRX4 as an interactor of the CrRLK1L-type receptor kinase FER revealed an LRX4-RALF1-  
297 FER signaling axis involved in regulating cell growth and vacuole development [35]. Support  
298 for this model is provided by the analysis of LRX4 deletion constructs, where a correlation  
299 between FER interaction and membrane association could be established. This signaling  
300 cascade thus also represents a link between the plasma membrane and a protein that is  
301 insolubilized in the cell wall via its extensin domain [31,32,33,50].

302 *FER* is expressed in many plant tissues and several *LRX* genes are expressed in different  
303 tissues with little overlap in their expression patterns [29]. Thus, it is plausible to assume that  
304 several LRXs of different tissues interact with FER to establish the FER-LRX interaction across  
305 diverse cell types. This assumption is corroborated by similar phenotypes of *fer-4* and an  
306 *lrx12345* quintuple mutant and by the demonstration of FER-RALF1-LRX1/2/4/5 interactions  
307 by different experimental approaches. *LRX6* and *LRX7* are two *LRX* genes not characterized  
308 so far. *LRX6* is expressed during lateral root formation and *LRX7* in flowers [29]. A heptuplicate  
309 *lrx* mutant line affected in all vegetatively expressed *LRX* genes would possibly show an even  
310 more severe defect in growth and development. Comparable to the interaction with FER,  
311 several LRXs including LRX1 interact with RALF1 and both interactions involve the LRR  
312 domain. This is corroborated by the very recently described LRX-RALF crystal structure [51].  
313 Different LRXs bind an overlapping but not identical array of RALF peptides [35,38], and the  
314 full binding spectrum of the different LRXs might be even broader. One reason for the distinct

315 RALF binding spectrum of LRXs is based on their expression pattern. Pollen-localized LRX8  
316 shows a much higher affinity to the pollen-localized RALF4 than the root/shoot-localized  
317 RALF1 [41]. It can be speculated that the diverse affinities of RALFs and LRXs contribute to  
318 the specificities of the plant's response to different RALF peptides that have distinct biological  
319 activities [17,18,19,20,25,52]. An additional regulatory layer is added by the pH that is  
320 influenced by e.g. RALFs and modifies their binding to interaction partners [20]. Crystallization  
321 analyses suggest that LRXs form dimers and both monomers can bind a RALF peptide [51].  
322 Whether LRXs form homo- and/or heterodimers in vivo and whether these can bind different  
323 RALFs remains to be unraveled. Possibly, the exact pairs of LRX-RALF interactions influence  
324 binding of other proteins. These might include additional CrRLK1Ls but possibly also other  
325 plasma membrane-localized receptors. BAK1 is a co-receptor binding other receptor kinases  
326 such as FER or FLS2 [53] but also RALF1 and is required for the response of the plant to  
327 RALF1 [25]. It will be interesting to investigate whether some LRXs can interact with BAK1 or,  
328 alternatively, with apoplastic proteins not associated with the plasma membrane. These lines  
329 of research need to be followed to better understand the function of LRX proteins in cell wall  
330 development.

331 Earlier experiments with the root hair-expressed *LRX1* and *LRX2* suggested synergistic  
332 interaction and functional equivalence of these two LRXs [36]. The rescue experiments for *lrx1*,  
333 *lrx1 lrx2*, and *lrx345* mutants suggest that LRXs of vegetative tissues are functionally similar,  
334 as all combinations of mutants with these genes resulted in rescue of the mutant phenotypes.  
335 In contrast, the pollen-expressed *LRX8* and *LRX11* appear to have too strongly diverged to  
336 fulfill the same 'vegetative' functions as they barely rescue the *lrx1 lrx2* double mutant. This  
337 divergence is in part supported by phylogenetic analyses that revealed evolutionary separation  
338 of pollen- and vegetatively expressed LRXs [29,48]. The rescue experiments have also  
339 revealed that the construct *35S:L3E1* complements the *lrx1* and *lrx1 lrx2* mutants, which is  
340 remarkable since LRX3 fails to interact with FER [also reported by [38]] and RALF1. LRX  
341 proteins possibly interact with different, so far unknown proteins in addition to FER and the  
342 identified RALFs, and this activity might be sufficient for complementation of the *lrx* mutant

343 phenotypes. Alternatively, the *in vivo* binding activity of LRX3 is not identical to the one  
344 observed in yeast-two-hybrid, BLITZ, or Co-IP experiments of tobacco-expressed proteins.  
345 Future experiments on binding capacities of different LRXs to so far unknown proteins or other  
346 CrRLK1Ls will be necessary to clarify this issue. In pollen tubes, the *FER*-homologs *ANX1/2*  
347 and *BUPS1/2* but not *FER* are expressed [6,10,21]. Thus, pollen-expressed LRXs possibly  
348 interact with these CrRLK1Ls. The finding that expression of *AUN1<sup>D94N</sup>*, a dominant  
349 hypomorph variant of AUN1 partially suppresses not only *anx1 anx2* but also the *lrx8-lrx11*  
350 quadruple mutant pollen bursting phenotype [27] is indicative of LRX and ANX1/ANX2 being  
351 active in the same pathway. The *anx1 anx2* suppressor mutants *AUN1<sup>D94N</sup>* and *MRI<sup>R240C</sup>*  
352 also partially suppress the *lrx1 lrx2* mutant root hair phenotype. Hence, the LRX-RALF-  
353 CrRLK1L signaling pathway is at least partially conserved among different cell types,  
354 suggesting that CrRLK1Ls use a common set of downstream signaling components.  
355 Protein-protein interactions analyzed so far involve the LRR domain of LRXs. Yet, the NT-  
356 domain of unknown function is also important for LRX activity, since an NT deletion construct  
357 in LRX1 impairs protein function. The development of a dominant negative effect when  
358 expressing an extensin-less LRX1 [32,33] also depends on the presence of the NT-domain,  
359 even though binding of RALF1 and FER are NT-domain independent. Again, these data  
360 indicate possible additional features of LRX proteins beyond their interaction with CrRLK1Ls  
361 and RALFs that contribute to their full biological activity. The activity of the NT-domain and  
362 whether it is involved in binding other proteins remains to be determined.  
363 Potential differences in the function of the LRX extensin domains have not been investigated  
364 here, but rather avoided by using the *LRX1* extensin coding sequence for all complementation  
365 constructs. The extensin domain is variable among the LRXs both in terms of length and the  
366 repetitive motifs typical for this structural protein domain [29,31,50]. It is possible that the  
367 extensin domains of the different LRXs have adapted to the specific cell wall composition of  
368 the various tissues they are active in, which would explain the considerable differences in the  
369 extensin domains [29]. Extensins form covalent links with other extensins or with

370 polysaccharides in the cell wall [50,54,55], and the composition of cell walls differs  
371 considerably among cell types [56,57].

372

373 Cell growth requires the controlled simultaneous expansion of the cell wall and the protoplast,  
374 and this might be monitored through a FER-LRX interaction that depends on physical proximity  
375 of the two proteins and, consequently, of the plasma membrane and the cell wall. The observed  
376 regulation of vacuolar dynamics required for cell growth by FER and LRXs [42], supports this  
377 hypothesis, since both partners are attached/embedded in their subcellular structure.  
378 Detaching LRX proteins from the cell wall by removal of the extensin domain interferes with  
379 this balanced system, causing a defect in cell growth [32,33,35]. This work expands the FER-  
380 LRXs interaction to LRX5 in root/shoot tissue and reveals an LRX1-RALF1-FER interaction  
381 network important for proper root hair growth. The functional redundancy among LRX proteins  
382 of different vegetative and reproductive tissues indicates that LRXs function is not limited to  
383 interaction with FER. Clearly, different RALFs and probably different CrRLK1Ls are  
384 demonstrated or potential binding partners of LRXs, where the specificities of interaction might  
385 reflect differences in the biological processes triggered by the interactions. In future studies, it  
386 will be important to analyze the dynamics of LRX-RALF-FER interactions and to identify  
387 additional intra- and extracellular factors involved in the process to better understand the  
388 implications and mechanisms of this cell wall integrity sensing network in the regulation of cell  
389 growth.

390

## 391 **Materials and Methods**

### 392 **Plant growth and propagation**

393 *Arabidopsis thaliana* of the ecotype Columbia were used for all experiments. Seeds were  
394 surface sterilized with 1% Sodium hypochlorite, 0.03% TritonX-100, washed three times with  
395 sterile water, and, unless stated otherwise, plated on half-strength MS plates (0.5X MS salt,  
396 2% Sucrose, 0.5 mg/L nicotinic acid, 0.5 mg/L pyridoxine-HCl, 0.1 mg/L thiamine-HCl, glycine

397 2 mg/L, 0.5 g/L MES, pH 5.7, 0.6% Gelzan (Sigma); referred to as standard medium) under a  
398 16hrs light – 8 hrs dark photoperiod at 22°C. For propagation and crossings, plants were grown  
399 under the same conditions in soil.

400 For selection of transgenic lines, seeds of plants used for *Agrobacterium* (GV3101)-mediated  
401 transformation by the floral-dip method, were plated on 0.5 MS plates, 2% sucrose, 0.8%  
402 bactoagar, supplemented with appropriate antibiotics; 100 µg/ml ticarcillin, 50 µg/ml  
403 kanamycin or 10 µg/ml glufosinate-ammonium.

404

#### 405 **Molecular markers**

406 PCR-based molecular markers used to produce the different lines are described in [37] for *lrx3*,  
407 *lrx4*, and *lrx5*, [58] for *lrx1*, [36] for *lrx2*, and [42] for *fer-4*. The primers used for the PCR  
408 reactions are listed in the Supplementary Data Table S1.

409

#### 410 **DNA constructs**

411 For the *LRX4<sup>ΔE</sup>* construct, the coding sequence of the N-terminal half of LRX4 was amplified  
412 using the primers LRX4oE\_XhoI\_F and LRX4\_PstI\_R (Supplementary Table S2). This product  
413 was digested with *XhoI* and *PstI* and ligated with a fragment encoding a double FLAG tag with  
414 a *PstI* and a *XbaI* site at the 5' and 3' end, respectively, into the plasmid pART7 [59] digested  
415 with *XhoI* and *XbaI*, resulting in the *35S:LRX4<sup>ΔE</sup>-2FLAG* construct. All final constructs were  
416 control sequenced.

417 For *LRX4<sup>ΔLRRΔE</sup>*, the sequence from the start codon to the end of the NT-domain was  
418 amplified with LRX4oE\_XhoI\_F and LRX4<sup>ΔLRR</sup>\_PstI\_R, the resulting fragment digested with  
419 *XhoI* and *PstI* and cloned into the plasmid *35S:LRX4<sup>ΔE</sup>-2FLAG* cut with the same enzymes.

420 For *LRX4<sup>ΔNTΔE</sup>*, the sequence encoding the signal peptide was amplified with primers  
421 LRX4\_XhoI\_F and LRX4\_ΔNT\_R and the LRR domain with the primers LRX4\_ΔNT\_F and  
422 LRX4\_PstI\_R, the fragments were digested with *XhoI/BamHI* and *BamHI/PstI*, respectively  
423 and cloned by triple ligation into *35S:LRX4<sup>ΔE</sup>-2FLAG* cut with *XhoI* and *PstI*.



424 For *LRX1*<sup>ΔE</sup>-FLAG, the *LRX1* fragment was amplified using the primers LRX1\_XhoI\_F and  
425 LRX1\_PstI\_R, digested with *XhoI/PstI* and cloned into the vector *pART7\_LR4*<sup>ΔE</sup>-FLAG  
426 digested with the same enzymes to release the *LR4*<sup>ΔE</sup> sequence. For the 35S:L1E1  
427 construct, the plasmid 35S:LRX1<sup>ΔE</sup>-2FLAG was opened with *PstI* and *XbaI* and a *PstI-SpeI*  
428 fragment containing the extensin-coding sequence [36] was inserted.

429 The *LRX1:LRX1*<sup>ΔE</sup> construct containing the *cmcy* tag in front of the *LRR* domain is described  
430 elsewhere [33]. For the *LRX1:LRX1*<sup>ΔLRR</sup><sup>ΔE</sup> construct, the promoter and coding sequence up  
431 to the end of the *cmcy*-tag was amplified with the primers LRX1\_Prom1000\_F and  
432 LRX1\_ΔLRR\_SpeI\_R, and the resulting fragment was digested with *MluI* (in the *LRX1*  
433 promoter) and *SpeI* (at the end of the *myc* tag sequence) and cloned into the *LRX1:LRX1*  
434 construct cut with the same enzymes (*SpeI* overlapping with the stop codon of the *LRX1* coding  
435 sequence). For *LRX1:LRX1*<sup>ΔNT</sup><sup>ΔE</sup>, the promoter and signal peptide coding sequence was  
436 amplified with the primers LRX1\_Prom1000\_F and LRX1\_ΔNT\_SalI\_R and the resulting  
437 fragment was digested with *MluI* (in the promoter) and *SalI* (at the end of the signal peptide  
438 sequence) and cloned into *LRX1:LRX1*<sup>ΔE</sup> cut with the same enzymes (the *SalI* site in the  
439 *LRX1:LRX1*<sup>ΔE</sup> construct is at the beginning of the *cmcy* coding sequence). For  
440 *LRX1:LRX1*<sup>ΔNT</sup> the *MluI-SalI* fragment of *LRX1:LRX1*<sup>ΔNT</sup><sup>ΔE</sup> was ligated into *LRX1:LRX1* cut  
441 with the same enzymes.

442 For the 35S:L3/4/5/8/10/11-E1 constructs, the coding sequences from the ATG to the CRD-  
443 coding sequence were amplified with primers (Suppl. Table S2) introducing a *KpnI* or an *XhoI*  
444 and a *PstI* site at the 5' and 3' end of the PCR product, respectively, and the fragments were  
445 ligated into 35S:L1E1 cut with the same enzymes to release the L1 coding sequence.

446 All the *pART7*-based expression cassettes were cut out with *NotI* and cloned into the binary  
447 vector *pART27* [59] cut with the same enzyme.

448 Cloning of *MRIR*<sup>240C</sup> CDS without stop codon in Gateway® compatible binary vector *pMRI*-  
449 :GW-YFP plasmid (*pABD83*, Basta Resistance) to obtain *pMRI:AUN1*<sup>D94N</sup>-YFP was  
450 described previously (Boisson-Dernier et al., 2015). To obtain *pMRI:AUN1*<sup>D94N</sup>-YFP,

451 *AUN1<sup>D94N</sup>* CDS without stop codon in *pDONR207* (Invitrogen) (Franck et al., 2018b) was  
452 remobilized into *pABD83*.

453 The *BD-LRX4* and *AD-FER<sup>ECD</sup>* constructs for the Yeast-two-hybrid experiment were cloned  
454 as previously described [35], where *NtermFER* equals *AD-FER<sup>ECD</sup>* and *LRR4* equals *BD-*  
455 *LRX4*. For the *BD-LRX1/2/3/5* constructs, the coding sequence of the LRR domain coding  
456 sequence of the *LRXs* was amplified using primers (Suppl. Table S2) to introduce a *Bam*HI  
457 and a *Xho*I site at the 5' and 3' end of the PCR fragments, respectively. These were cloned  
458 into *pJET1.2* (Thermo Scientific) and correct clones were cut with *Bam*HI and *Xho*I and ligated  
459 into *pGBKT7* cut with *Bam*HI and *Sal*I. The AD-RALF1 construct was cloned into *pJET1.2*  
460 (Thermo Scientific) by amplification of the coding sequence with the primers y2h\_RALF1\_F  
461 and y2h\_RALF1\_R. A correct clone was cut with *Eco*RI and *Xma*I and ligated into *pGADT7*  
462 cut with *Eco*RI and *Xma*I.

463

#### 464 **Phenotyping of seedling growth properties**

465 For the quantification of gravitropism, seedlings were grown in a vertical orientation on  
466 standard MS medium for 8 days, and the ratio of root progression in the vertical axes over total  
467 root length was used as the parameter, as described [47]. For measurements, the plates were  
468 scanned and analyzed by ImageJ. To ascertain consistent results, seedlings of different  
469 generations were used and at least 10 seedlings were measured for one data point.

470 The accumulation of anthocyanin was quantified on 12 days-old seedlings grown in a vertical  
471 orientation on standard medium by published methods [60,61]. Twenty seedlings were pooled  
472 and incubated in 45% Methanol, 5% acetic acid. After centrifugation for 5 min at RT and 13'000  
473 rpm, the supernatant was used to measure absorption at 530 nm for anthocyanin and at 657  
474 nm for chlorophyll content correction; final value =  $Abs_{530nm} - (0.25 \times Abs_{657nm})$ . One data point  
475 in the graph is the average of quadruplicates.

476 For root length measurements, seedlings were grown for 7 days on standard medium in a  
477 vertical orientation, plates were scanned, and ImageJ was used to measure root length. The  
478 average of at least 15 seedlings was used for one data point.

479 Root hair phenotypes were assessed in 5 days-old seedlings grown in a vertical orientation on  
480 standard medium. Pictures of root hair were taken with a MZ125 Binocular (Leica), using a  
481 DFC420 digital camera (Leica).

482

### 483 **Co-immunoprecipitation**

484 Co-IP experiments were performed exactly as previously described [35]. For pulldown and co-  
485 IP analysis of the different constructs indicated in the experiments were infiltrated into  
486 *Nicotiana benthamiana* leaves, and after 48 hrs, the leaves were excised and grinded in liquid  
487 nitrogen. The tissue powder was re-suspended in extraction buffer [200 mM Tris-HCl (pH 7.5),  
488 150 mM NaCl, 1 mM DTT, 1 mM PMSF, protease inhibitor and 0.5% Triton X-100]. The  
489 suspension was incubated on ice for 20 minutes and then centrifuged at 13,000 rpm for 30  
490 minutes at 4°C. The supernatant obtained was then incubated with GFP-trap agarose beads,  
491 anti-HA, or anti-FLAG magnetic beads overnight at 4°C on a rotating shaker. After incubation,  
492 the beads were washed three times with the wash buffer (extraction buffer containing 0.05%  
493 Triton X-100) and boiled in SDS-PAGE loading buffer for 15 minutes at 75°C. The  
494 immunoprecipitates were then run on a 10% SDS-PAGE and transferred to nitrocellulose  
495 membrane to perform Western blotting.

496

### 497 **BLITZ analysis**

498 The BLITZ experiments were performed as previously described [41].

499 The *LRR<sup>ΔE</sup>-FLAG* versions of the different *LRXs* were expressed under the 35S promoter in  
500 *N. benthamiana*, presence of proteins was checked by western blotting, and proteins were  
501 immune-precipitated as described above. After immunoprecipitation, elution was performed  
502 with 30 µl of 1M Glycine (pH 2.0) buffer for 2 min in a Thermomixer (Eppendorf) at 1200 rpm,  
503 then beads were spun down for 2 min at 1300xg at RT, and the supernatant was neutralized  
504 with 30 µl of 1M Tris-HCl (pH 9.5). Protein concentration was determined by Qubit  
505 measurement (Quant-iT™ Protein Assay kit, Invitrogen). Samples were diluted 1:1 with  
506 sample diluent buffer (Pall FortéBio cat18-1091) to a concentration of 0.142 mg/ml for analysis

507 using the BLITz<sup>®</sup> system. The same buffer was used to dilute the anti-FLAG M2 antibody  
508 (Sigma-Aldrich) 1:50 to a final concentration of 4 µg/ml. A 1:1 mix of sample:antibody was then  
509 incubated for 30 minutes at RT, and loaded onto the protein A biosensor (Pall FortéBio cat 18-  
510 5010). The experiment was divided into 5 different steps: Initial baseline duration (30 s),  
511 Loading duration (120 s), Baseline duration (30 s), Association duration (120 s), and  
512 Dissociation duration (120 s). Different RALF synthetic peptide concentrations (200 µM, 150  
513 µM, 100 µM, 50 µM, 20 µM, 15 µM, 10 µM, 4 µM, 2 µM and 0.2 µM) were added to quantify  
514 the protein interaction.

515

### 516 **Western blotting**

517 To test the accumulation of LRX1<sup>ΔE</sup>, LRX1<sup>ΔLRRΔE</sup>, and LRX1<sup>ΔLNTΔE</sup> proteins, root material  
518 of 300 seedlings grown for 10 days in a vertical orientation was collected and ground in liquid  
519 N<sub>2</sub>. Around 50 mg of fresh material was extracted with 200 µl 0.1% SDS by vortexing,  
520 immediately followed by heating to 95°C for 5 min. After cooling, material was centrifuged at  
521 13'000 rpm for 10 min and 20 µl of the supernatant was used for SDS-PAGE and blotting to  
522 nitrocellulose membranes using semi-dry blotting. After over-night blocking of the membranes  
523 in 1xTBS, 0.1% Tween-20, 5% low-fat milk powder, the membranes were incubated in 1xTBS,  
524 0.1% Tween-20, 0.5% low-fat milk powder containing primary antibodies as indicated in the  
525 figures, followed by a peroxidase-coupled secondary antibody, diluted 1:1000 each. After each  
526 antibody incubation, the membranes were washed three times with the antibody-incubation  
527 solution. The signal of the secondary antibody was detected using the ECL technology.

528

### 529 **RT-PCR**

530 Semi-quantitative RT-PCR was performed on RNA isolated of 10 days-old seedlings using the  
531 total RNA isolation system (Promega). Reverse transcription was performed on 300 ng of total  
532 RNA using the iScript advanced kit (BioRad). PCR was performed using gene-specific primers

533 as listed in the supplementary data Table S3. Correct amplification of the expected DNA band  
534 was verified by sequencing of the PCR products.

535

### 536 **Yeast-two-hybrid**

537 Transformation of the yeast strain PJ69-4A [62] was done following standard procedures and  
538 quadruple drop-out medium lacking Leu, Trp, His, and Ade were used to screen for positive  
539 interactions after 4 days incubation at 30°C. Always three different colonies containing both  
540 vectors were mixed and plated in triplicates on quadruple drop-out medium.

541

### 542 **Membrane fractionation**

543 Membrane fractionation was performed as described [34] using an established method [63].  
544 Homogenized tissue samples were suspended in 3 volumes of ice-cold extraction buffer [250  
545 mM sorbitol; 50 mM Tris-HCl, 2 mM EDTA; pH 8.0 (HCl); immediately before use add: 5 mM  
546 DTT; 0.6 % insoluble PVP; 0.001 M PMSF; 10  $\mu$ L/mL Protease Inhibitor Cocktail (Sigma  
547 P9599)]. The material was first centrifuged at 5,000g and 10,000g for 5 minutes each at 4°C  
548 to remove cell debris. The supernatant was then centrifuged at 40,000 rpm for 1 hour at 4°C  
549 and the pelleted membrane fraction was resuspended in [5 mM KH<sub>2</sub>PO<sub>4</sub>; 330 mM sucrose; 3  
550 mM KCl; pH 7.8 (KOH); 0.5% n-Dodecyl- $\beta$ -D-maltopyranoside]. The samples were used for  
551 SDS-PAGE and Western blotting, where the LRX1 $\Delta$ E LRX1 $\Delta$ LRR $\Delta$ E were detected with an  
552 anti-cmyc and LHC1a with an anti-LHC1 antibody.

553

### 554 **Gene identifiers of genes used in this study**

555 FER: At3G51550; RALF1:At1G02900; LRX1: At1g12040; LR2: At1g62440; LRX3: At4g13340;  
556 LRX4: At3g24480; LRX5: At4g18670; LRX8: At3g19020; LRX10: At2g15880; LRX11:  
557 At4g33970

558

559 **Acknowledgments**

560 We are grateful to Ueli Grossniklaus and Valeria Gagliardini for introducing SG to the BLITZ  
561 experimental procedure. This work was supported by the Swiss National Science Foundation  
562 (grant Nr. 31003A\_166577) to CR and in part by a grant from the University of Cologne Centre  
563 of Excellence in Plant Sciences to ABD.

564

565

566 **References**

567

568 1. Houston K, Tucker MR, Chowdhury J, Shirley N, Little A (2016) The plant cell wall: a complex  
569 and dynamic structure as revealed by the responses of genes under stress conditions.

570 Front Plant Sci 7.

571 2. Braidwood L, Breuer C, Sugimoto K (2014) My body is a cage: mechanisms and modulation  
572 of plant cell growth. New Phytol 201: 388-402.

573 3. Wolf S, Hematy K, Hoefte H (2012) Growth control and cell wall signaling in plants. In:  
574 Merchant SS, editor. Annu Rev Plant Biol. pp. 381-407.

575 4. Hématy K, Sado P-E, Van Tuinen A, Rochange S, Desnos T, et al. (2007) A receptor-like  
576 kinase mediates the response of Arabidopsis cells to the inhibition of cellulose  
577 synthesis. Curr Biol 17: 922-931.

578 5. Schoenaers S, Balcerowicz D, Breen G, Hill K, Zdanio M, et al. (2018) The auxin-regulated  
579 CrRLK1L kinase ERULUS controls cell wall composition during root hair tip growth.  
580 Curr Biol 28: 722-732.

581 6. Boisson-Dernier A, Roy S, Kritsas K, Grobei MA, Jaciubek M, et al. (2009) Disruption of the  
582 pollen-expressed *FERONIA* homologs *ANXUR1* and *ANXUR2* triggers pollen tube  
583 discharge. Development 136: 3279-3288.

584 7. Guo HQ, Li L, Ye HX, Yu XF, Algreen A, et al. (2009) Three related receptor-like kinases  
585 are required for optimal cell elongation in *Arabidopsis thaliana*. Proc Natl Acad Sci USA  
586 106: 7648-7653.

587 8. Franck CM, Westermann J, Boisson-Dernier A (2018a) Plant malectin-like receptor kinases:  
588 from cell wall integrity to immunity and beyond. In: Merchant SS, editor. Annu Rev Plant  
589 Biol. pp. 301-328.

590 9. Kwon T, Sparks JA, Liao FQ, Blancaflor EB (2018) ERULUS is a plasma membrane-  
591 localized receptor-like kinase that specifies root hair growth by maintaining tip-focused  
592 cytoplasmic calcium oscillations. Plant Cell 30: 1173-1177.

- 593 10. Escobar-Restrepo JM, Huck N, Kessler S, Gagliardini V, Gheyselinck J, et al. (2007) The  
594 FERONIA receptor-like kinase mediates male-female interactions during pollen tube  
595 reception. *Science* 317: 656-660.
- 596 11. Feng W, Kita D, Peaucelle A, Cartwright HN, Doan V, et al. (2018) The FERONIA receptor  
597 kinase maintains cell-wall integrity during salt stress through Ca<sup>2+</sup> signaling. *Curr Biol*  
598 28: 666-675.
- 599 12. Shih HW, Miller ND, Dai C, Spalding EP, Monshausen GB (2014) The receptor-like kinase  
600 FERONIA is required for mechanical signal transduction in Arabidopsis seedlings. *Curr*  
601 *Biol* 24: 1887-1892.
- 602 13. Li C, Wu HM, Cheung AY (2016) FERONIA and her pals: functions and mechanisms. *Plant*  
603 *Physiol* 171: 2379-2392.
- 604 14. Pearce G, Moura DS, Stratmann J, Ryan CA (2001) RALF, a 5-kDa ubiquitous polypeptide  
605 in plants, arrests root growth and development. *Proc Natl Acad Sci USA* 98: 12843-  
606 12847.
- 607 15. Haruta M, Sabat G, Stecker K, Minkoff BB, Sussman MR (2014) A peptide hormone and  
608 its receptor protein kinase regulate plant cell expansion. *Science* 343: 408-411.
- 609 16. Haruta M, Monshausen G, Gilroy S, Sussman MR (2008) A cytoplasmic Ca<sup>2+</sup> functional  
610 assay for identifying and purifying endogenous cell signaling peptides in Arabidopsis  
611 seedlings: Identification of AtRALF1 peptide. *Biochem* 47: 6311-6321.
- 612 17. Stegmann M, Monaghan J, Smakowska-Luzan E, Rovenich H, Lehner A, et al. (2017) The  
613 receptor kinase FER is a RALF-regulated scaffold controlling plant immune signaling.  
614 *Science* 355: 287-289.
- 615 18. Murphy E, De Smet I (2014) Understanding the RALF family: a tale of many species.  
616 *Trends Plant Sci* 19: 664-671.
- 617 19. Nissen KS, Willats WGT, Malinovsky FG (2016) Understanding CrRLK1L Function: cell  
618 walls and growth control. *Trends Plant Sci* 21: 516-527.



- 619 20. Gonneau M, Desprez T, Martin M, Doblus VG, Bacete L, et al. (2018) Receptor kinase  
620 THESEUS1 is a rapid alkalization factor 34 receptor in Arabidopsis. *Curr Biol* 28:  
621 2452-2458.
- 622 21. Ge ZX, Bergonci T, Zhao YL, Zou YJ, Du S, et al. (2017) Arabidopsis pollen tube integrity  
623 and sperm release are regulated by RALF-mediated signaling. *Science* 358: 1596-  
624 1599.
- 625 22. Li C, Yeh FL, Cheung AY, Duan Q, Kita D, et al. (2015) Glycosylphosphatidylinositol-  
626 anchored proteins as chaperones and co-receptors for FERONIA receptor kinase  
627 signaling in Arabidopsis. *Elife* 4.
- 628 23. Duan QH, Kita D, Li C, Cheung AY, Wu HM (2010) FERONIA receptor-like kinase regulates  
629 RHO GTPase signaling of root hair development. *Proc Natl Acad Sci USA* 107: 17821-  
630 17826.
- 631 24. Chen J, Yu F, Liu Y, Du CQ, Li XS, et al. (2016) FERONIA interacts with ABI2-type  
632 phosphatases to facilitate signaling cross-talk between abscisic acid and RALF peptide  
633 in Arabidopsis. *Proc Natl Acad Sci USA* 113: E5519-E5527.
- 634 25. Dressano K, Ceciliato PHO, Silva AL, Guerrero-Abad JC, Bergonci T, et al. (2017) BAK1  
635 is involved in AtRALF1-induced inhibition of root cell expansion. *PLoS Genet* 13.
- 636 26. Boisson-Dernier A, Franck CM, Lituiev DS, Grossniklaus U (2015) Receptor-like  
637 cytoplasmic kinase MARIS functions downstream of CrRLK1L-dependent signaling  
638 during tip growth. *Proc Natl Acad Sci USA* 112: 12211-12216.
- 639 27. Franck CM, Westermann J, Burssner S, Lentz R, Lituiev DS, et al. (2018b) The protein  
640 phosphatases ATUNIS1 and ATUNIS2 regulate cell wall integrity in tip-growing cells.  
641 *Plant Cell* 30: 1906-1923.
- 642 28. Rubinstein AL, Broadwater AH, Lowrey KB, Bedinger PA (1995) *PEX1*, a pollen-specific  
643 gene with an extensin-like domain. *Proc Natl Acad Sci USA* 92: 3086-3090.
- 644 29. Baumberger N, Doesseger B, Guyot R, Diet A, Parsons RL, et al. (2003a) Whole-genome  
645 comparison of leucine-rich repeat extensins in Arabidopsis and rice: a conserved family

- 646 of cell wall proteins form a vegetative and a reproductive clade. *Plant Physiol* 131:  
647 1313-1326.
- 648 30. Showalter AM, Keppler B, Lichtenberg J, Gu D, Welch LR (2010) A bioinformatics approach  
649 to the identification, classification, and analysis of hydroxyproline-rich glycoproteins.  
650 *Plant Physiol* 153: 485-513.
- 651 31. Borassi C, Sede AR, Mecchia MA, Salgado Salter JD, Marzol E, et al. (2016) An update  
652 on cell surface proteins containing extensin-motifs. *J Exp Bot* 67: 477-487.
- 653 32. Baumberger N, Ringli C, Keller B (2001) The chimeric leucine-rich repeat/extensin cell wall  
654 protein LRX1 is required for root hair morphogenesis in *Arabidopsis thaliana*. *Genes*  
655 *Dev* 15: 1128-1139.
- 656 33. Ringli C (2010) The hydroxyproline-rich glycoprotein domain of the Arabidopsis LRX1  
657 requires Tyr for function but not for insolubilization in the cell wall. *Plant J* 63: 662-669.
- 658 34. Fabrice T, Vogler H, Draeger C, Munglani G, Gupta S, et al. (2018) LRX proteins play a  
659 crucial role in pollen grain and pollen tube cell wall development. *Plant Physiol* 176:  
660 1981-1992.
- 661 35. Dünser K, Gupta S, Herger A, Feraru MI, Ringli C, et al. (2019) Extracellular matrix sensing  
662 by FERONIA and Leucine-Rich Repeat Extensins controls vacuolar expansion during  
663 cellular elongation in *Arabidopsis thaliana*. *EMBO J*: 10.15252/emboj.2018100353.
- 664 36. Baumberger N, Steiner M, Ryser U, Keller B, Ringli C (2003b) Synergistic interaction of  
665 the two paralogous Arabidopsis genes *LRX1* and *LRX2* in cell wall formation during  
666 root hair development. *Plant J* 35: 71-81.
- 667 37. Draeger C, Fabrice TN, Gineau E, Mouille G, Kuhn BM, et al. (2015) Arabidopsis leucine-  
668 rich repeat extensin (LRX) proteins modify cell wall composition and influence plant  
669 growth. *BMC Plant Biol* 15: doi.org/10.1186/s12870-12015-10548-12878.
- 670 38. Zhao CZ, Zayed O, Yu ZP, Jiang W, Zhu PP, et al. (2018) Leucine-rich repeat extensin  
671 proteins regulate plant salt tolerance in Arabidopsis. *Proc Natl Acad Sci USA* 115:  
672 13123-13128.

- 673 39. Sede AR, Borassi C, Wengier DL, Mecchia MA, Estevez JM, et al. (2018) Arabidopsis  
674 pollen extensins LRX are required for cell wall integrity during pollen tube growth. *Febs*  
675 *Lett* 592: 233-243.
- 676 40. Wang XX, Wang KY, Yin GM, Liu XY, Liu M, et al. (2018) Pollen-expressed leucine-rich  
677 repeat extensins are essential for pollen germination and growth. *Plant Physiol* 176:  
678 1993-2006.
- 679 41. Mecchia MA, Santos-Fernandez G, Duss NN, Somoza SC, Boisson-Dernier A, et al. (2017)  
680 RALF4/19 peptides interact with LRX proteins to control pollen tube growth in  
681 Arabidopsis. *Science* 358: 1600-1603.
- 682 42. Dünser K, Gupta S, Ringli C, Kleine-Vehn J (2018) LRX- and FER-dependent extracellular  
683 sensing coordinates vacuolar size for cytosol homeostasis. *bioRxiv*  
684 [doi.org/10.1101/231043](https://doi.org/10.1101/231043).
- 685 43. Klimmek F, Ganeteg U, Ihalainen JA, van Roon H, Jensen PE, et al. (2005) Structure of  
686 the higher plant light harvesting complex I: In vivo characterization and structural  
687 interdependence of the Lhca proteins. *Biochem* 44: 3065-3073.
- 688 44. Diet A, Link B, Seifert GJ, Schellenberg B, Wagner U, et al. (2006) The Arabidopsis root  
689 hair cell wall formation mutant *lrx1* is suppressed by mutations in the *RHM1* gene  
690 encoding a UDP-L-rhamnose synthase. *Plant Cell* 18: 1630-1641.
- 691 45. Leiber RM, John F, Verhertbruggen Y, Diet A, Knox JP, et al. (2010) The TOR pathway  
692 modulates the structure of cell walls in Arabidopsis. *Plant Cell* 22: 1898-1908.
- 693 46. Dong QK, Zhang ZW, Liu YT, Tao LZ, Liu HL (2019) FERONIA regulates auxin-mediated  
694 lateral root development and primary root gravitropism. *Febs Lett* 593: 97-106.
- 695 47. Grabov A, Ashley MK, Rigas S, Hatzopoulos P, Dolan L, et al. (2005) Morphometric  
696 analysis of root shape. *New Phytol* 165: 641-651.
- 697 48. Liu X, Wolfe R, Welch LR, Domozych DS, Popper ZA, et al. (2016) Bioinformatic  
698 identification and analysis of extensins in the plant kingdom. *PLoS One* 11.

- 699 49. Miyazaki S, Murata T, Sakurai-Ozato N, Kubo M, Demura T, et al. (2009) *ANXUR1* and 2,  
700 sister genes to *FERONIA/SIRENE*, are male factors for coordinated fertilization. *Curr*  
701 *Biol* 19: 1327-1331.
- 702 50. Showalter AM, Basu D (2016) Extensin and arabinogalactan-protein biosynthesis:  
703 glycosyltransferases, research challenges, and biosensors. *Front Plant Sci* 7.
- 704 51. Moussu S, Broyart C, Santos-Fernandez G, Augustin S, Wehrle S, et al. (2019) Structural  
705 basis for recognition of RALF peptides by LRX proteins during pollen tube growth.  
706 *BioRxiv*: <http://dx.doi.org/10.1101/695874>.
- 707 52. Srivastava R, Liu JX, Guo HQ, Yin YH, Howell SH (2009) Regulation and processing of a  
708 plant peptide hormone, AtRALF23, in Arabidopsis. *Plant J* 59: 930-939.
- 709 53. Hohmann U, Lau K, Hothorn M (2017) The structural basis of ligand perception and signal  
710 activation by receptor kinases. *Annu Rev Plant Biol* 68: 109-137.
- 711 54. Qi XY, Behrens BX, West PR, Mort AJ (1995) Solubilization and partial characterization of  
712 extensin fragments from cell walls of cotton suspension-cultures - evidence for a  
713 covalent cross-link between extensin and pectin. *Plant Physiol* 108: 1691-1701.
- 714 55. Cassab GI (1998) Plant cell wall proteins. *Annu Rev Plant Physiol Plant Molec Biol* 49:  
715 281-309.
- 716 56. Knox JP (2008) Revealing the structural and functional diversity of plant cell walls. *Curr*  
717 *Opin Plant Biol* 11: 308-313.
- 718 57. Dardelle F, Lehner A, Ramdani Y, Bardor M, Lerouge P, et al. (2010) Biochemical and  
719 immunocytological characterizations of Arabidopsis pollen tube cell wall. *Plant Physiol*  
720 153: 1563-1576.
- 721 58. Diet A, Brunner S, Ringli C (2004) The *enl* mutants enhance the *lrx1* root hair mutant  
722 phenotype of *Arabidopsis thaliana*. *Plant Cell Physiol* 45: 734-741.
- 723 59. Gleave AP (1992) A versatile binary vector system with a T-DNA organisational structure  
724 conducive to efficient integration of cloned DNA into the plant genome. *Plant Mol Biol*  
725 20: 1203-1207.

- 726 60. Laby RJ, Kincaid MS, Kim DG, Gibson SI (2000) The Arabidopsis sugar-insensitive  
727 mutants *sis4* and *sis5* are defective in abscisic acid synthesis and response. *Plant J*  
728 23: 587-596.
- 729 61. Matsui K, Tanaka H, Ohme-Takagi M (2004) Suppression of the biosynthesis of  
730 proanthocyanidin in Arabidopsis by a chimeric PAP1 repressor. *Plant Biotechnol J* 2:  
731 487-493.
- 732 62. James P, Halladay J, Craig EA (1996) Genomic libraries and a host strain designed for  
733 highly efficient two-hybrid selection in yeast. *Genetics* 144: 1425-1436.
- 734 63. Jasinski M, Stukkens Y, Degand H, Purnelle B, Marchand-Brynaert J, et al. (2001) A plant  
735 plasma membrane ATP binding cassette-type transporter is involved in antifungal  
736 terpenoid secretion. *Plant Cell* 13: 1095-1107.

737  
738

### 739 **Supplementary Data**

- 740 Suppl. Figure S1 Interaction of LRXs and FER.
- 741 Suppl. Figure S2 LRX1<sup>ΔNT</sup> does not complement the *lrx1* and *lrx1 lrx2* mutants.
- 742 Suppl. Figure S3 Interaction of LRX1 and RALF1 in yeast.
- 743 Suppl. Figure S4 BLITZ output data.
- 744 Suppl. Figure S5 RT-PCR confirming expression of the transgenes.
- 745 Suppl. Figure S6 Complementation of *lrx345* and *lrx1* mutants.
- 746 Suppl. Figure S7 Fluorescence of *AUN1<sup>D94N</sup>-YFP* and *MRJ<sup>R240C</sup>-YFP* transgenic lines.
- 747 Suppl. Table S1 Primers used for genotyping.
- 748 Suppl. Table S2 Primers used for cloning.
- 749 Suppl. Table S3 Primers used for RT-PCR.

750  
751  
752

753 **Figures**

754

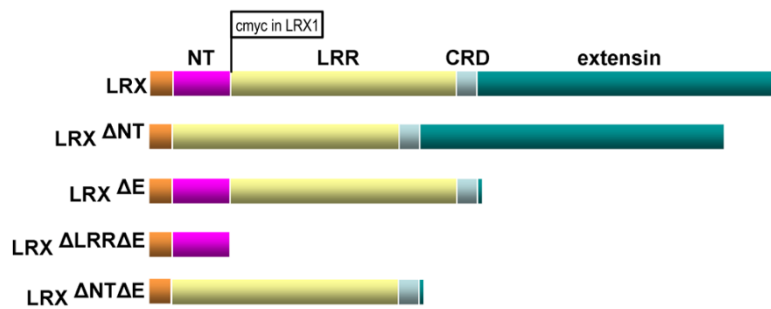

755

756

757

758 **Figure 1** Structure of LRX proteins and deletion constructs used in this study.

759 LRX proteins consist of a signal peptide for export of the protein (light brown), an NT-terminal  
760 domain (purple) of unknown function, an leucine-rich repeat (LRR) domain (yellow), a Cys-rich  
761 hinge region (CRD), and a C-terminal extensin domain (green), with Ser-Hyp<sub>n</sub> repeats typical  
762 of hydroxyproline-rich glycoproteins, for insolubilization of the protein in the cell wall. The  
763 different deletion constructs used in this study are listed, with "Δ" indicating deleted domains.  
764 In the LRX1 construct, a myc tag was introduced between the NT- and the LRR-domain,  
765 which does not interfere with protein function and allows for immuno-detection of LRX1.

766

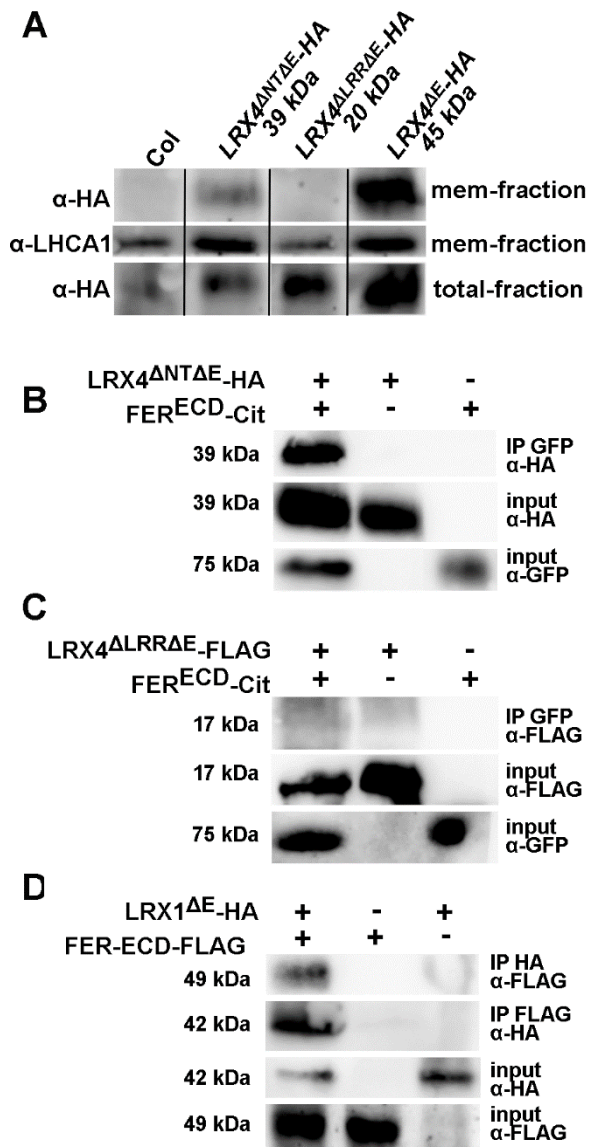

767

768 **Figure 2** Correlation of membrane association and interaction with FER.

769 (A) Western-blot of membrane fractions of transgenic Arabidopsis expressing constructs as

770 indicated. LHCA1 is a membrane-associated protein confirming identity of membrane fraction.

771 (B and C) LRX4<sup>ΔNTΔE</sup> (B) but not LRX4<sup>ΔLRRΔE</sup> (C) can be co-purified with FER<sup>ECD</sup> when

772 expressed in tobacco, indicating that the LRR domain is sufficient and necessary for in planta

773 interaction with FER<sup>ECD</sup>. (D) When co-expressed in tobacco LRX1<sup>ΔE</sup> and FER<sup>ECD</sup> can be

774 co-immunoprecipitated, indicative for the interaction of the two proteins. Antibodies used for IP

775 and subsequent detection by western blotting are indicated.

776

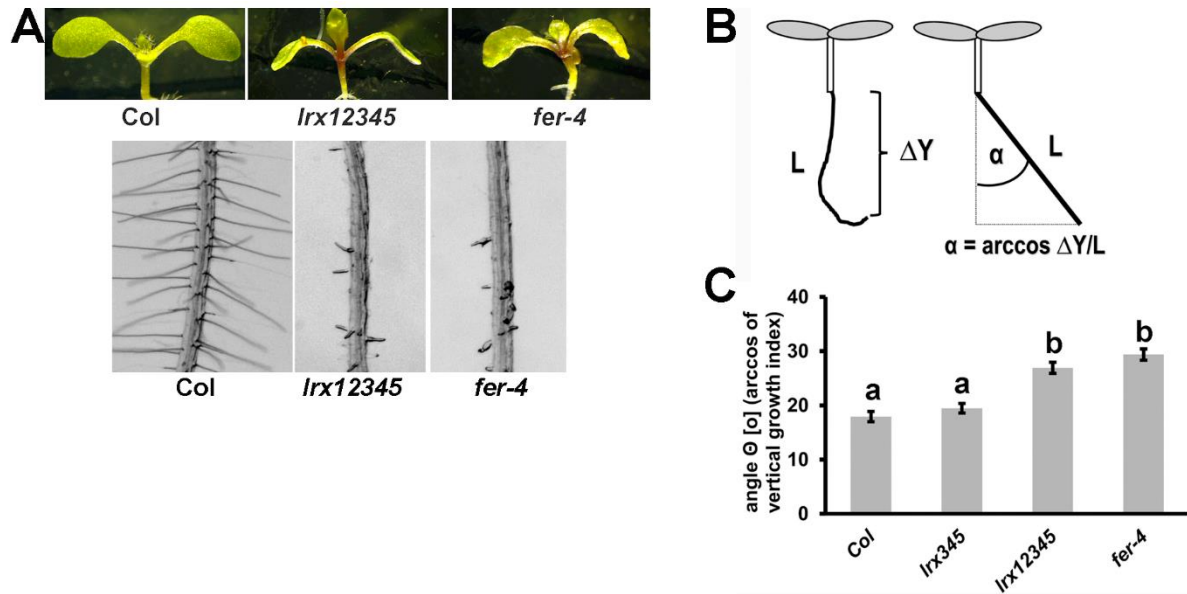

777

778 **Figure 3** *fer-4* and *Irx12345* mutants show comparable phenotypes.

779 (A) Seedlings were grown for 5 days on half-strength MS for analysis of root hair formation

780 (bottom) and another 5 days for analysis of shoot development (top). (B) Quantification of

781 gravitropic response by the root growth index. (C) Increasing agravitropy by accumulation of

782 *Irx* mutations. Error bars represent SEM. Different letters above bars indicate significant

783 differences (T-test,  $n > 20$ ,  $P < 0.0001$ ). Bar=5mm (A, top lane), 0.5 mm (A bottom lane)

784

785



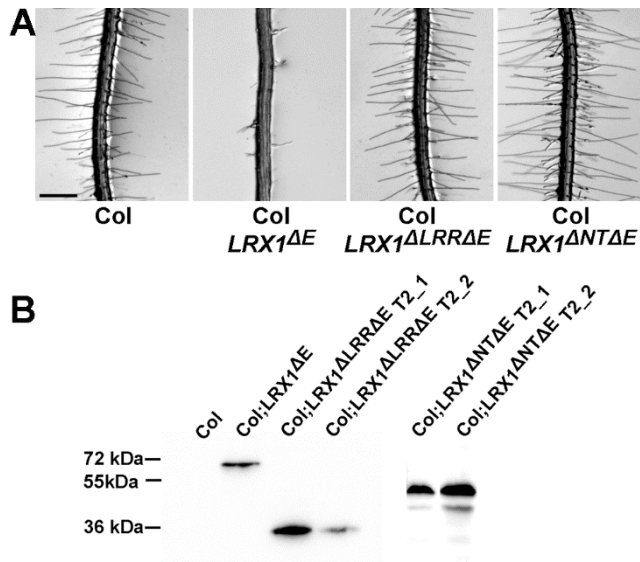

786

787 **Figure 4** Both the LRR and NT domains are required for inducing the dominant negative

788 effect of LRX1 $\Delta$ E.

789 (A) Wild type seedlings (Col) or transgenic Col lines expressing LRX1 $\Delta$ E , LRX1 $\Delta$ LRR $\Delta$ E, or

790 LRX1 $\Delta$ NT $\Delta$ E (for structure see Figure 1). The dominant negative effect of LRX1 $\Delta$ E depends on

791 both the LRR and the NT domains. A representative example of several independent

792 transgenic lines is shown. (B) Western-blot using an anti-cmyc antibody detecting the proteins

793 encoded by the transgenic lines shown in (A). Bar= 0.5 mm

794

795

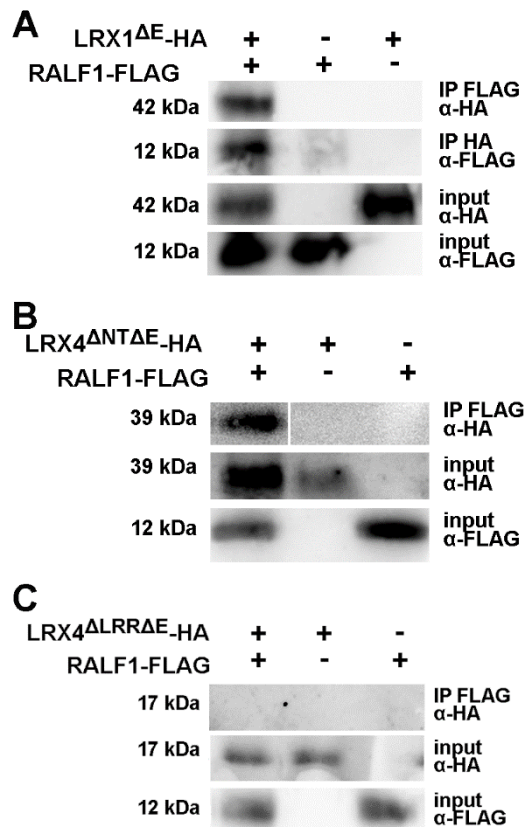

796

797 **Figure 5** RALF1 is bound via the LRR domain of LRX proteins.

798 (A) When co-expressed in tobacco LRX1 $\Delta$ E and RALF1 can be co-immunoprecipitated,

799 indicative for interaction of the two proteins. (B and C) LRX4 $\Delta$ NT $\Delta$ E (B) but not LRX4 $\Delta$ LRR $\Delta$ E

800 (C) are co-purified with RALF1, indicating that RALF1 is bound by the LRR domain. Antibodies

801 used for IP and subsequent detection by western blotting are indicated.

802

803

804

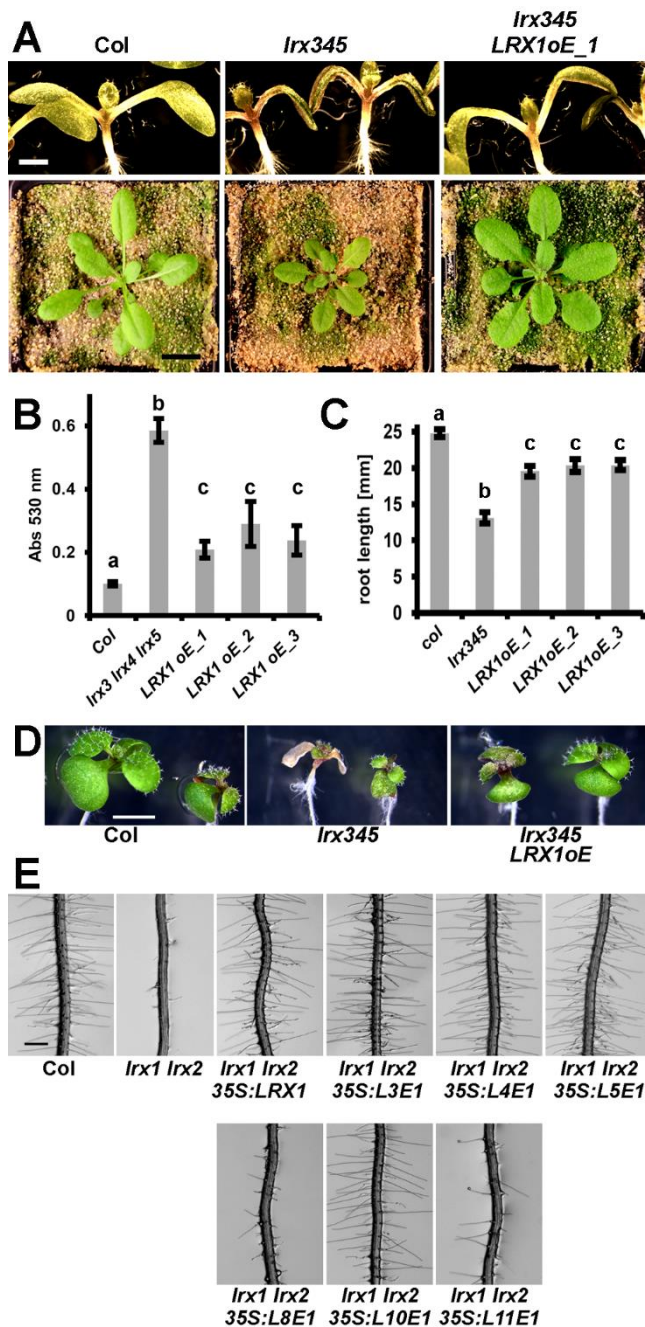

805

806 **Figure 6** Functional redundancy among LRX proteins.

807 (A-C) Complementation of the *lrx345* triple mutant with the 35S:LRX1 construct.

808 Representative examples are shown. (A) Seedling shoots after 7 days of growth on half-

809 strength MS (upper lane) and plants grown in soil (lower lane). (B) Anthocyanin accumulation

810 in 12-days-old seedlings is increased in the *lrx345*. (C and D) The *lrx345* mutant seedlings

811 grown in the presence of 100 mM NaCl show increased salt sensitivity, resulting in shorter

812 roots (C) and impairment of shoot growth (D) compared to control Col, which are both

813 alleviated by LRX1 overexpression. Error bars represent SEM; different letters above the

814 graphs indicate significant differences (T-test,  $N > 20$ ,  $P < 0.05$ ). (E) Complementation of the *lrx1*  
815 *lrx2* root hair defect by chimeric construct of L3,4,5,8,10, and 11 (ATG start codon to CRD)  
816 fused to the extensin coding sequence of *LRX1* (*E1*) under the 35S promoter. Representative  
817 examples of several independent transgenic lines for each construct are shown. Bars = 5 mm  
818 (A,D) and 0.5 mm (E).

819

820

821

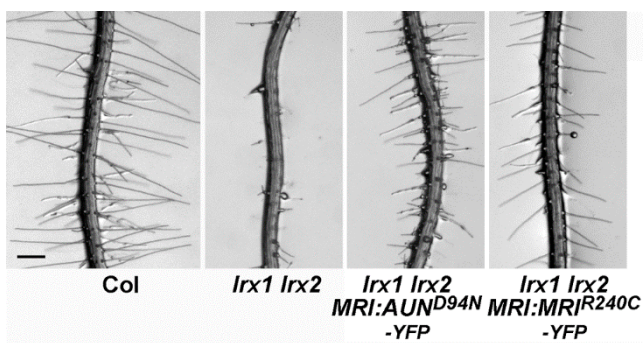

822

823 **Figure 7** Expression of *AUN1<sup>D94N</sup>* and *MRIR<sup>240C</sup>* partially suppress the *lrx1 lrx2* root  
824 hair defect.

825 Seedlings were grown for 5 days on half-strength MS in a vertical orientation. Representative  
826 examples of several independent transgenic *lrx1 lrx2* double mutant expressing either  
827 *pMRI:AUN1<sup>D94N</sup>-YFP* or *pMRI:MRIR<sup>240C</sup>-YFP* are shown. Bar = 0.5 mm
